# Supplementary material for: Iron sulphide rice grain nanostructures as potential electrocatalysts for an improved oxygen evolution reaction
Source: Royal Society of Chemistry journal article supplement (doi:10.1039/d1nr04138j), 2021-01-01
Supplement: d1nr04138j1.pdf [file d1nr04138j1.pdf]

**Supporting Information**

**Iron Sulphide Rice Grain Nanostructures as Potential Electrocatalysts for  
Improved Oxygen Evolution Reaction**

*Rajasekaran Elakkiya and Govindhan Maduraiveeran\**

Materials Electrochemistry Laboratory, Department of Chemistry  
SRM Institute of Science and Technology  
Kattankulathur, Chennai, Tamil Nadu-603203

\*Corresponding Author: E-mail: [maduraig@srmist.edu.in](mailto:maduraig@srmist.edu.in)

**Table S1.** Comparison of the as-developed FeS nanostructured electrodes in this study and other electrodes reported in the literature.

| Materials                                              | Overpotential (V) at 10 mA cm <sup>-2</sup> | Electrolyte | Tafel (mV dec <sup>-1</sup> ) | Mass activity (A g <sup>-1</sup> ) | Ref        |
|--------------------------------------------------------|---------------------------------------------|-------------|-------------------------------|------------------------------------|------------|
| CaFe <sub>0.5</sub> Co <sub>0.5</sub> O <sub>3</sub>   | 0.26                                        | 0.1 M KOH   | 59.0                          | 0.55                               | 1          |
| Fe <sub>2</sub> /Co <sub>1</sub> -GNCL                 | 0.35                                        | 1.0 M KOH   | 70.0                          | -                                  | 2          |
| Ni-O-G                                                 | 0.22                                        | 1.0 M KOH   | 42.0                          | 0.46                               | 3          |
| Ni-Fe LDH                                              | 0.25<br>(20 mA cm <sup>-2</sup> )           | 1.0 M KOH   | 71.0                          | -                                  | 4          |
| SiW <sub>9</sub> Co <sub>3</sub> [h]@ZIF-67            | 0.42                                        | 1.0 M KOH   | 93.9                          | -                                  | 5          |
| Co <sub>2</sub> Mo <sub>3</sub> O <sub>8</sub> @NC-800 | 0.42                                        | 1.0 M KOH   | 87.5                          | 4.1                                | 6          |
| Fe-Co-O                                                | 0.26                                        | 1.0 M KOH   | 53.0                          | -                                  | 7          |
| Ag@Co(OH) <sub>x</sub>                                 | 0.25                                        | 1.0 M KOH   | 76.0                          | -                                  | 8          |
| HXP@NC800                                              | 0.31                                        | 1.0 M KOH   | 48.0                          | -                                  | 9          |
| FeS-NFS NF                                             | 0.22                                        | 1.0 M KOH   | 64.3                          | 1.6                                | This study |
| FeS-NPS NF                                             | 0.30                                        | 1.0 M KOH   | 72.5                          | 3.6                                | This study |
| FeS-RGS NF                                             | 0.20                                        | 1.0 M KOH   | 54.2                          | 5.4                                | This study |

GNCL: graphitized nitrogen-doped carbon layer; Ni-O-G: individual nickel (Ni) bonded to oxygen sites on graphene-like carbon; LDH: layered-double-hydroxide; ZIF: zeolitic imidazole frameworks; NC: nitrogen-rich carbon; HXP: 2D nickel-based MOF hexagonal nanoplate; NC: nanocrystal; NFS: nanoflowers; NF: nickel foam; NPS: nanoparticles; RGS: rice grain structures;

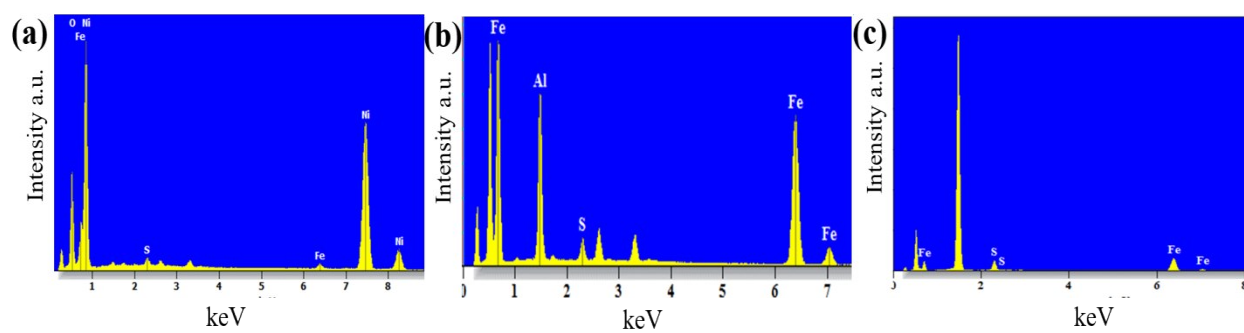

**Fig. S1.** EDX spectra of FeS-RGS (a), FeS-NFS (b) and FeS-NPS (c) nanomaterials.

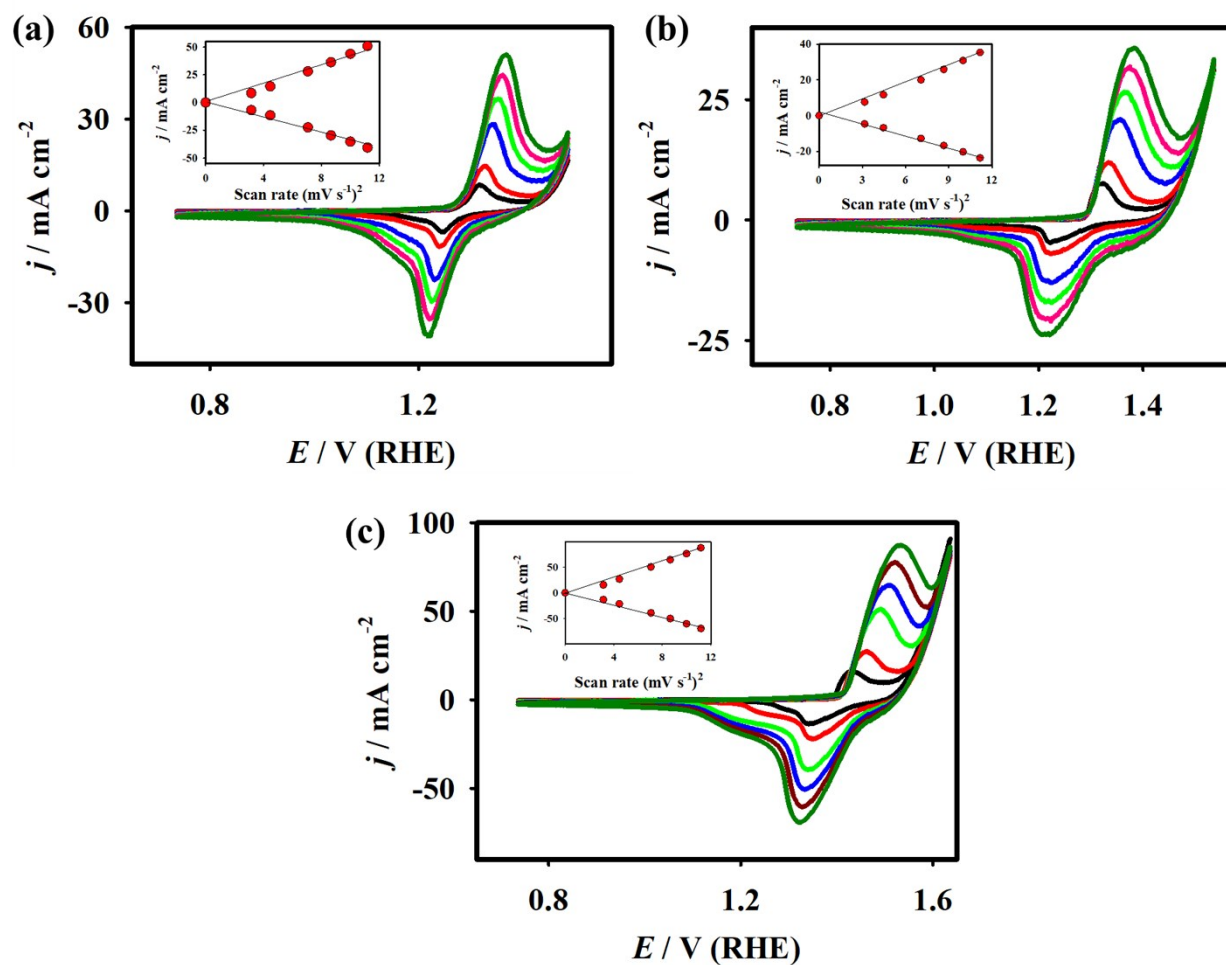

**Fig. S2.** CV curves of the FeS-RGS|NF (a), FeS-NFS|NF (b) and FeS-NPS|NF (c) electrodes recorded at different scan rates, starting from 10  $\text{mV s}^{-1}$  to 125  $\text{mV s}^{-1}$ . Inset showing the plot of peak currents vs square root of the scan rates.

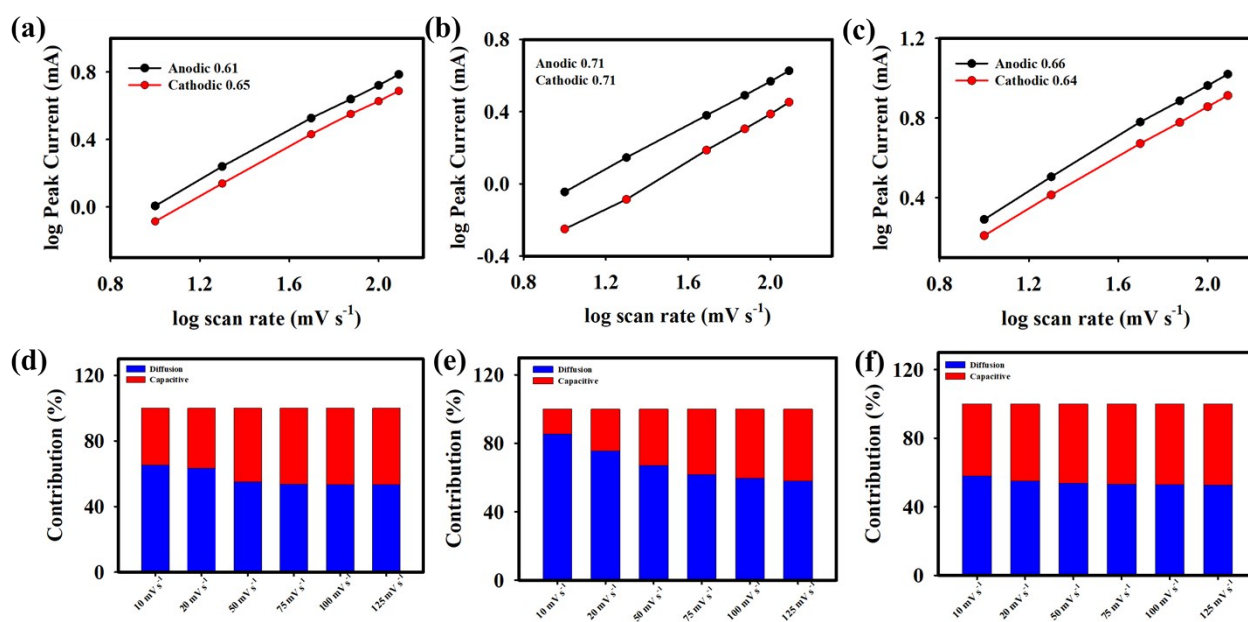

**Fig. S3.** Plot of logarithm peak current against logarithm scan rate measured for FeS-RGS|NF (a), FeS-NFS|NF (b) and FeS-NPS|NF (c) electrodes, derived from Fig. S2. Contribution ratio between diffusion controlled and capacitance at the FeS-RGS|NF (d), FeS-NFS|NF (e) and FeS-NPS|NF (f) electrodes.

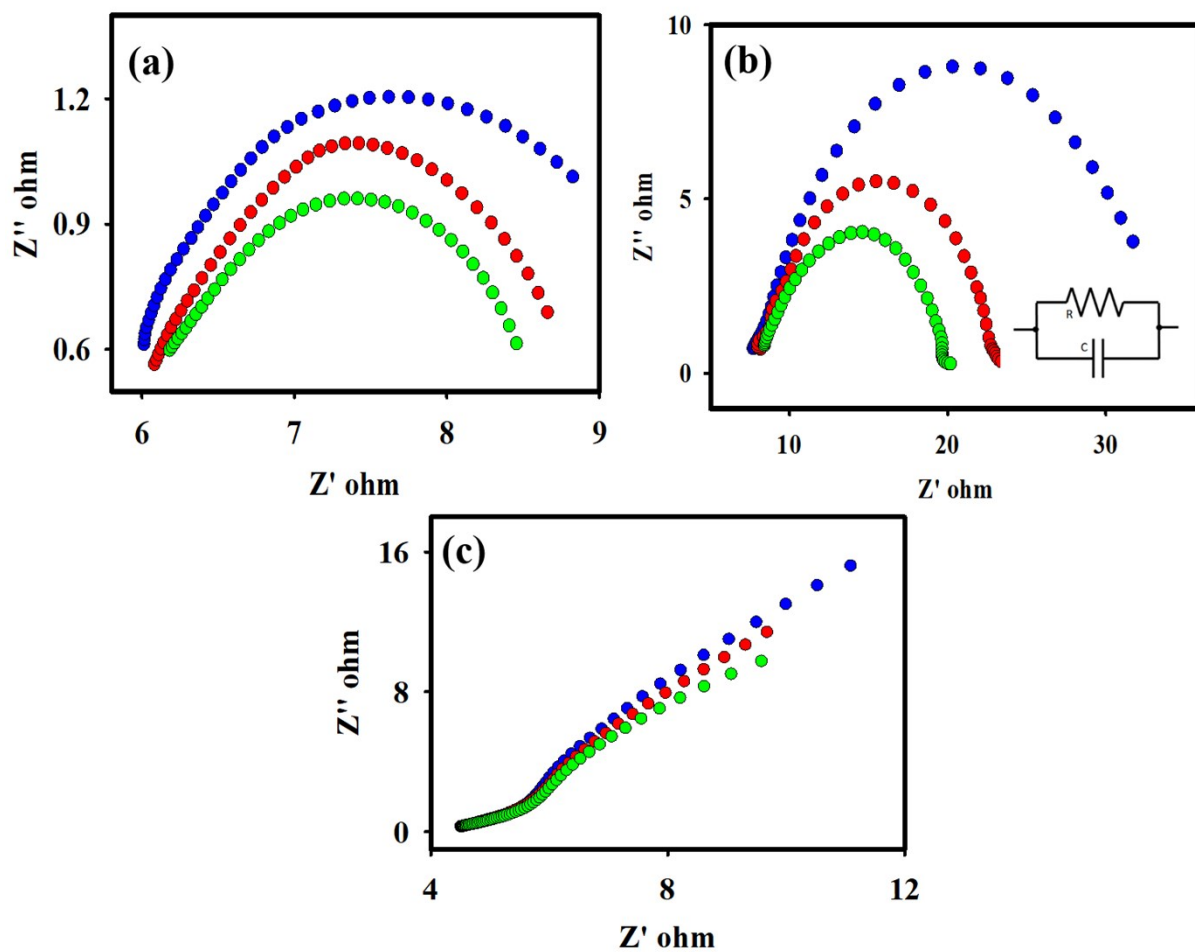

**Fig. S4.** Nyquist plot of the FeS-RGS|NF (a), FeS-NFS|NF (b) and FeS-NPS|NF (c) electrodes at the applied potential of 1.49 V (blue), 1.51 V (red) and 1.53 V (green) in 1.0 M KOH.

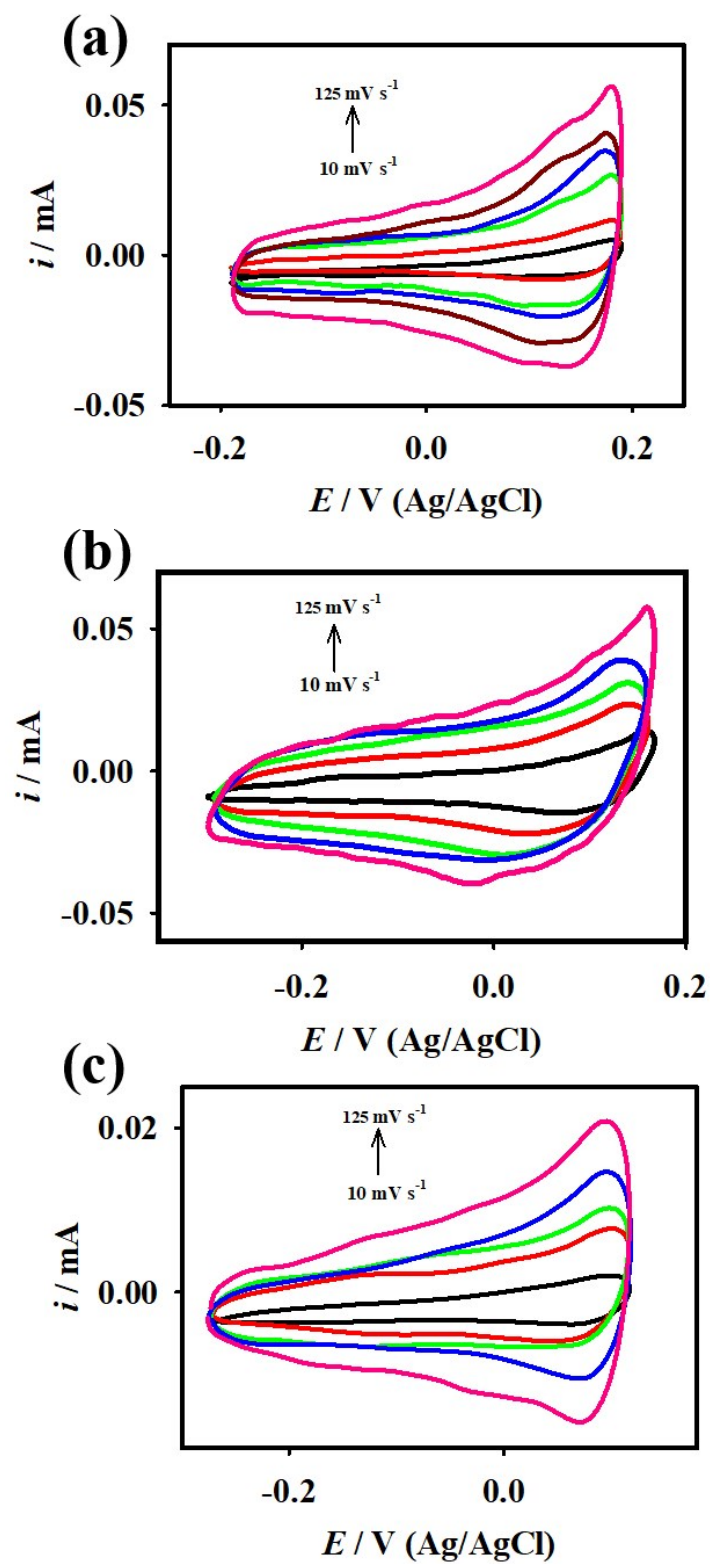

**Fig. S5.** CV curves of the FeS-RGS|NF (a), FeS-NFS|NF (b) and FeS-NPS|NF (c) electrodes recorded for the electrochemical double layer capacitance measurements at various scan rates.

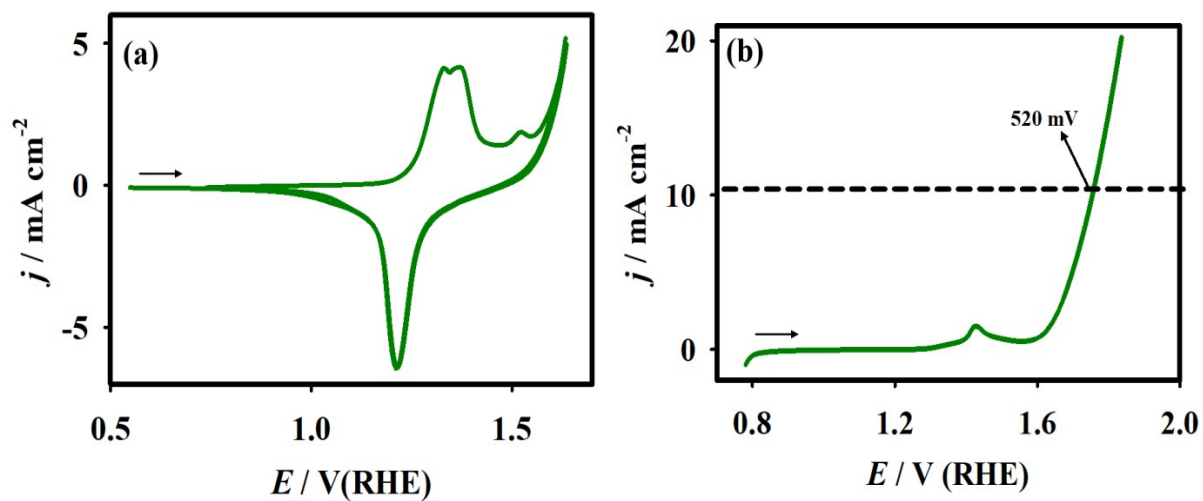

**Fig. S6.** CV curve (a) and LSV curve (b) of the CoS|NF electrodes recorded in 1.0 M KOH at a scan rate of 20 mV s<sup>-1</sup>.



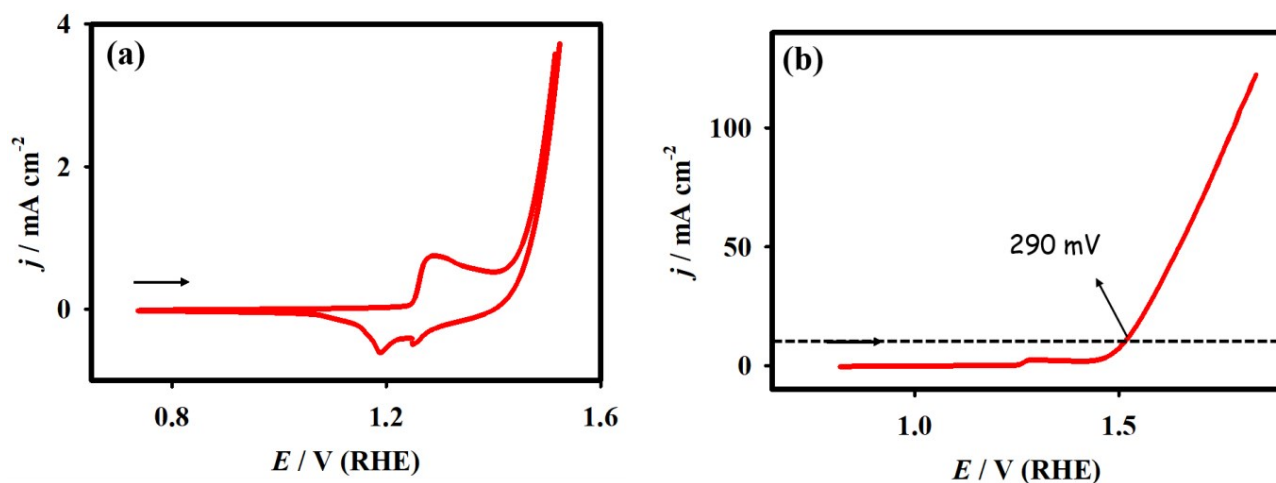

**Fig. S7.** CV curve (a) and LSV curve (b) of the FeCoS/NF electrodes recorded in 1.0 M KOH at a scan rate of 20 mV s<sup>-1</sup>.

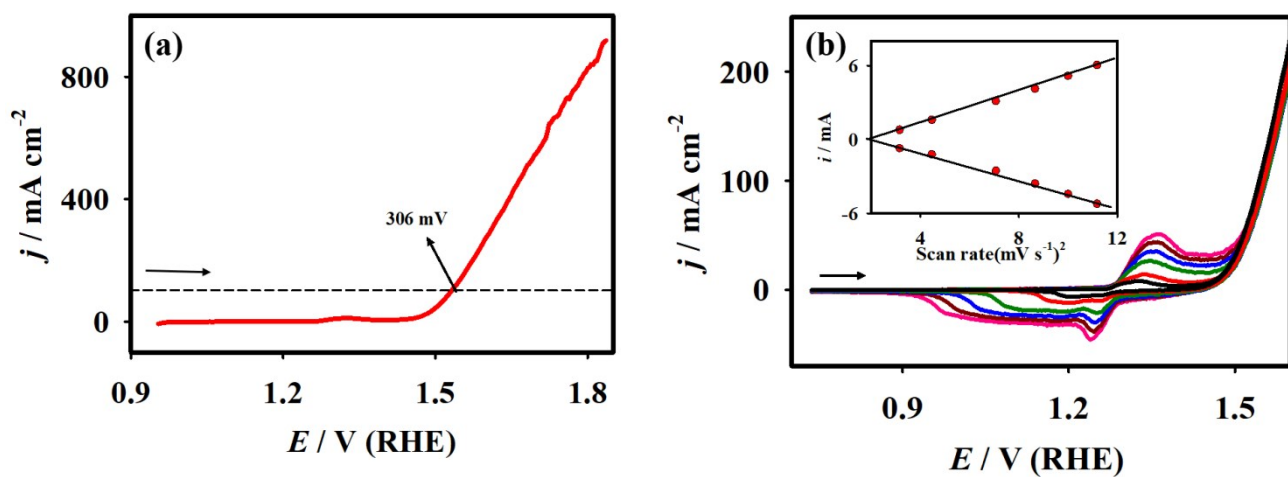

**Fig. S8.** LSV curve (a) and CV curves (b) of the FeS-RGS|NF electrode recorded in 30% KOH. The inset shows the plot of peak current vs square root of scan rates.

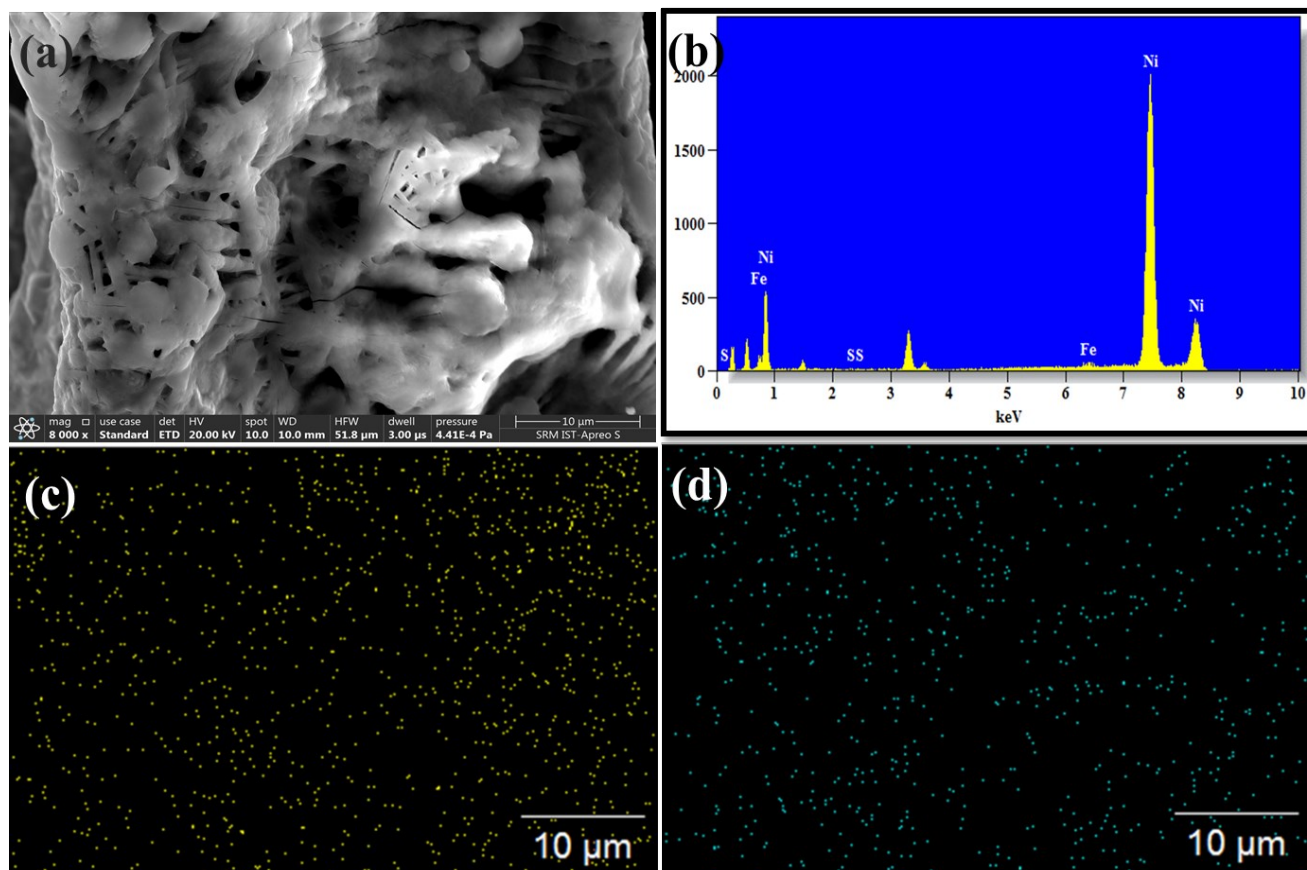

**Fig. S9.** SEM image (a), EDX spectra (b) and elemental mapping of Fe (c) and S (d) for the FeS-RGS|NF electrode measured after had a long-term stability test.

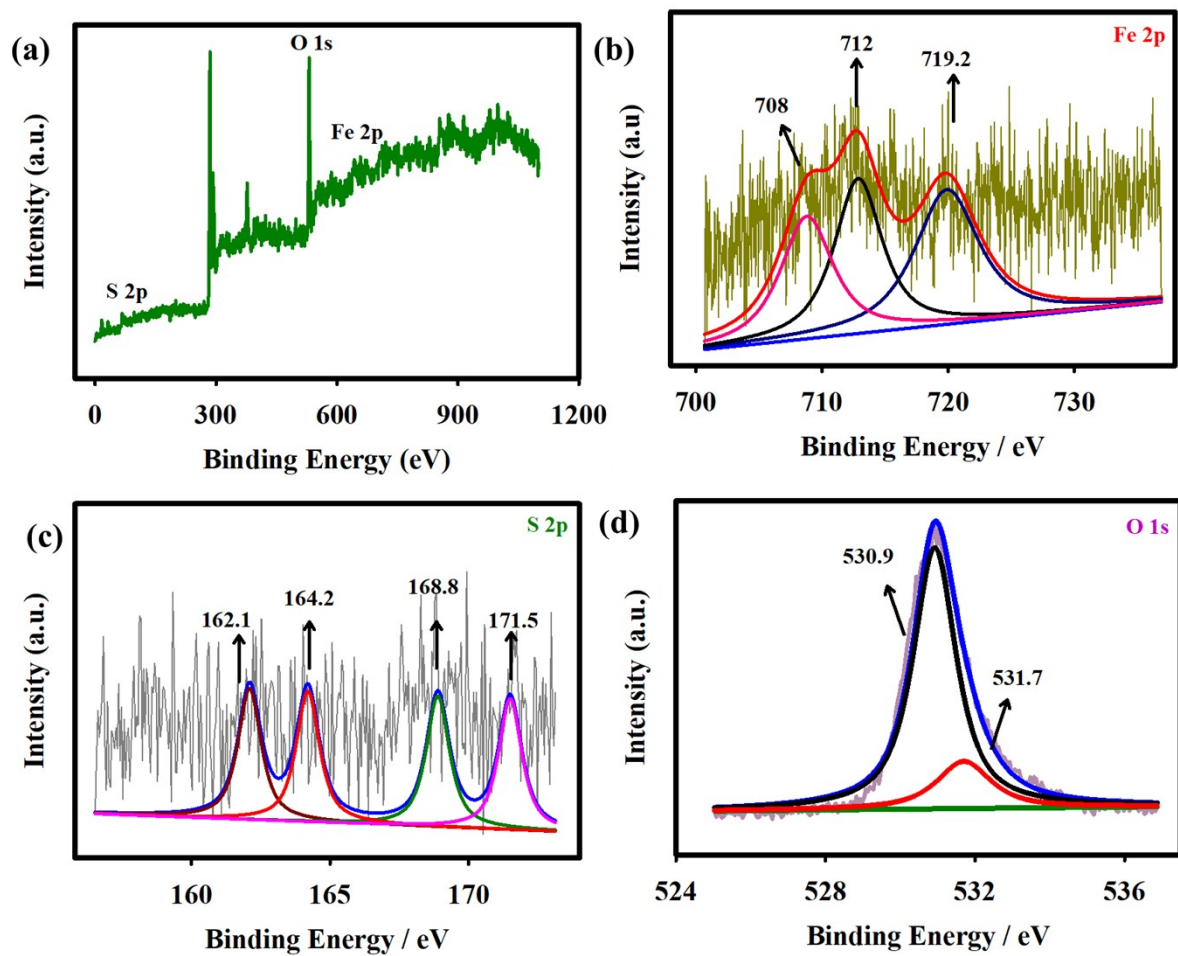

**Fig. S10.** Full scan XPS analysis of the FeS-RGS|NF electrode after had a long-term durability test (a) and its high resolution XPS spectra in the regions of Fe 2p (b), S 2p (c), and O 1s (d).

## References

- 1 I. Yamada, M. Kinoshita, S. Oda, H. Tsukasaki, S. Kawaguchi, K. Oka, S. Mori, H. Ikeno and S. Yagi, *Chem. Mater.*, 2020, **32**, 3893–3903.
- 2 Y. S. Wei, L. Sun, M. Wang, J. Hong, L. Zou, H. Liu, Y. Wang, M. Zhang, Z. Liu, Y. Li, S. Horike, K. Suenaga and Q. Xu, *Angew. Chemie - Int. Ed.*, 2020, **59**, 16013–16022.
- 3 Y. Li, Z. S. Wu, P. Lu, X. Wang, W. Liu, Z. Liu, J. Ma, W. Ren, Z. Jiang and X. Bao, *Adv. Sci.*, 2020, **7**, 1903089.
- 4 J. Zhang, L. Yu, Y. Chen, X. F. Lu, S. Gao and X. W. (David) Lou, *Adv. Mater.*, 2020, **32**, 1906432.
- 5 V. K. Abdelkader-Fernández, D. M. Fernandes, S. S. Balula, L. Cunha-Silva and C. Freire, *J. Mater. Chem. A*, 2020, **8**, 13509–13521.
- 6 T. Ouyang, X. T. Wang, X. Q. Mai, A. N. Chen, Z. Y. Tang and Z. Q. Liu, *Angew. Chemie - Int. Ed.*, 2020, **59**, 11948–11957.
- 7 Q. Wang, X. Xue, Y. Lei, Y. Wang, Y. Feng, X. Xiong, D. Wang and Y. Li, *Small*, 2020, **16**, 2001571.
- 8 Z. Zhang, X. Li, C. Zhong, N. Zhao, Y. Deng, X. Han and W. Hu, *Angew. Chemie*, 2020, **132**, 7312–7317.
- 9 Y. Lin, H. Wan, D. Wu, G. Chen, N. Zhang, X. Liu, J. Li, Y. Cao, G. Qiu and R. Ma, *J. Am. Chem. Soc.*, 2020, **142**, 7317–7321.
